# Supplementary material
Source: HighWire-hosted journal article supplement (https://diabetes.diabetesjournals.org/content/suppl/2004/07/27/53.8.2153)
Supplement: db0212Appendix1.pdf [file db0212Appendix1.pdf]

**Appendix 1**

**Haplotypes frequencies in the obese and control groups**

Twelve haplotypes were identified and numbered considering the decreasing frequencies in the obese group. Haplotypes with a frequency over 1% (HAP1 to HAP7) have been considered for the  $\chi^2$  test of the global repartition between the obese and control groups. For each SNP, “alleles 2” are in bold.

|       | SNP1     | SNP3     | SNP5        | SNP6     | SNP7     | SNP17    | Obese group<br>frequency $\pm$ SE (%) | SU.VI.MAX<br>group<br>frequency $\pm$ SE (%) |
|-------|----------|----------|-------------|----------|----------|----------|---------------------------------------|----------------------------------------------|
| HAP1  | C        | <b>A</b> | <b>DelG</b> | T        | C        | <b>C</b> | 52.14 $\pm$ 1.20                      | 56.33 $\pm$ 2.00                             |
| HAP2  | C        | G        | G           | T        | C        | G        | 34.89 $\pm$ 1.14                      | 28.41 $\pm$ 1.82                             |
| HAP3  | C        | G        | G           | T        | C        | <b>C</b> | 3.47 $\pm$ 0.44                       | 4.87 $\pm$ 0.87                              |
| HAP4  | C        | G        | <b>DelG</b> | T        | C        | <b>C</b> | 3.12 $\pm$ 0.42                       | 2.76 $\pm$ 0.66                              |
| HAP5  | C        | <b>A</b> | <b>DelG</b> | T        | C        | G        | 2.25 $\pm$ 0.36                       | 2.11 $\pm$ 0.58                              |
| HAP6  | C        | G        | G           | <b>C</b> | C        | G        | 2.02 $\pm$ 0.34                       | 1.30 $\pm$ 0.46                              |
| HAP7  | <b>T</b> | G        | G           | T        | C        | G        | 1.50 $\pm$ 0.29                       | 2.60 $\pm$ 0.64                              |
| HAP8  | C        | <b>A</b> | <b>DelG</b> | T        | <b>T</b> | <b>C</b> | 0.46 $\pm$ 0.16                       | 0.65 $\pm$ 0.32                              |
| HAP9  | C        | G        | G           | <b>C</b> | C        | <b>C</b> | 0.06 $\pm$ 0.06                       | 0.32 $\pm$ 0.23                              |
| HAP10 | <b>T</b> | G        | G           | T        | C        | <b>C</b> | 0.06 $\pm$ 0.06                       | 0.16 $\pm$ 0.16                              |
| HAP11 | C        | <b>A</b> | G           | T        | C        | <b>C</b> | 0,00 $\pm$ 0,00                       | 0.32 $\pm$ 0.16                              |
| HAP12 | C        | G        | G           | T        | <b>T</b> | G        | 0,00 $\pm$ 0,00                       | 0.16 $\pm$ 0.16                              |

>98%  
p=0.027
