# Supplementary material
Source: HighWire-hosted journal article supplement (https://diabetes.diabetesjournals.org/content/suppl/2004/07/27/53.8.2153)
Supplement: db0212Appendix2.pdf [file db0212Appendix2.pdf]

## Appendix 2

### Characteristics of the clinical and metabolic features in the obese and control groups

|                          | <b>Obese adult group</b> | <b>SU.VI.MAX Control group</b> | <b>Fleurbaix Control group</b> | <b>Obese children group</b> | <b>Diabetic group 1</b> | <b>Diabetic group 2</b> |
|--------------------------|--------------------------|--------------------------------|--------------------------------|-----------------------------|-------------------------|-------------------------|
| n                        | 857                      | 467                            | 247                            | 411                         | 369                     | 342                     |
| Sex (F/M)                | 633/224                  | 253/214                        | 153/94                         | 207/204                     | 171/198                 | 155/187                 |
| Age (years)              | 44.9 ± 12.1              | 54.6 ± 10.1                    | 42.6 ± 4.6                     | 11.3 ± 3.2                  | 61.2 ± 12.4             | 57.1 ± 11.5             |
| BMI (kg/m <sup>2</sup> ) | 47.6 ± 8.0               | 22.4 ± 2.1                     | 22.9 ± 2.23                    | 30.1 ± 6.5                  | 26.5 ± 4.5              | 27.2 ± 3.3              |
| Type 2 Diabetes (%)      | 33.0 %                   | 0 %                            | 0 %                            | 1.4 %                       | 100%                    | 100%                    |
| Dyslipidemia (%)         | 49.3 %                   | 34.8 %                         | -                              | 13.2 %                      | 54.7%                   | 51.7%                   |
