# Supplementary material
Source: HighWire-hosted journal article supplement (https://diabetes.diabetesjournals.org/content/suppl/2004/07/27/53.8.2153)
Supplement: db0212Appendix3.pdf [file db0212Appendix3.pdf]

### ***Appendix 3***

#### **Sequences of primers used for variant screening in the SREBF-1 gene**

| <b>Fragment</b> | <b>Location</b> | <b>Forward primer</b>          | <b>Reverse primer</b>          | <b>Size (bp)</b> | <b>T<sub>m</sub> (°C)</b> | <b>MgCl<sub>2</sub> (mM)</b> |
|-----------------|-----------------|--------------------------------|--------------------------------|------------------|---------------------------|------------------------------|
| 1               | Promoter 1a     | 5'- TGGGTACTGGCTTCCTCCTTCA -3' | 5'- CCAAACCTTCATTCCTCATTTC -3' | 400              | 62                        | 1                            |
| 2               | Promoter 1a     | 5'- CTTGGATCCTGGTCTGTCTTG -3'  | 5'- GAAAAGTTCCTCGGAAACTGG -3'  | 408              | 62                        | 2.5                          |
| 3               | Exon 1a         | 5'- TCGACCGCCCAGCAGA -3'       | 5'- GGAGACAAAGGCCAGGGAGA -3'   | 378              | 64                        | 1                            |
| 4               | Promoter 1c     | 5'- AACCTTATTTCCAGGCCTCA -5'   | 5'- CCCTGAGCGAGCCTTAACC -5'    | 303              | 62                        | 1                            |
| 5               | Promoter 1c     | 5'- TGTCCTGTTTTCTGGAGGAG -3'   | 5'- GGGGGCTCGAGTTTCA -3'       | 263              | 59                        | 1                            |
| 6               | Exon 1c         | 5'- TCAACGGCTTCAAAAATCCG -3'   | 5'- GAGGCATTGTATAAAGGGCTGG -3' | 167              | 62                        | 1                            |
| 7               | Exon 2          | 5'- ATGTGTGTGATGCCCTGTTT -3'   | 5'- GTGGCACTGACTCTTCCTTG -3'   | 362              | 63                        | 1.5                          |
| 8               | Exon 2          | 5'- CCACTCCATTGAAGATGTACCC -3' | 5'- AAGCCTGCACAGACCTCTACTC -3' | 313              | 61                        | 1                            |
| 9               | Exon 3          | 5'- AGTGGGAGAGGGAGGTCTGT -3'   | 5'- GGCTGTAAGCTGTGTGTCTGG -3'  | 301              | 60                        | 1.5                          |
| 10              | Exon 4          | 5'- CAGCCCCTGTAACGACCAC -3'    | 5'- AGATGGTTCGCCACTCAC -3'     | 375              | 58                        | 1.5                          |
| 11              | Exon 5          | 5'- CACACACACATGCCACCT -3'     | 5'- GTTGCCCTGATCTGTTCT -3'     | 329              | 65                        | 2.5                          |
| 12              | Exon 6          | 5'- GCTCTCCAACCCCAACAAC -3'    | 5'- GTGGAGCAAGGCTAGAGAAGA -3'  | 240              | 60                        | 1.5                          |
| 13              | Exon 7          | 5'- GGGTCACATATCCAGCCTTT -3'   | 5'- GCTCCAGGCCTCAGTTATTC -3'   | 398              | 57                        | 1                            |
| 14              | Exon 8          | 5'- CCTACCTCCCATTTCATAGAC -3'  | 5'- CAGAGCCCCAAGTTCACAAG -3'   | 431              | 58                        | 1.5                          |
| 15              | Exon 9          | 5'- GATACCACCAGCGTCTACCA -3'   | 5'- ACACCAGCACCTTCACA -3'      | 419              | 58                        | 1.5                          |
| 16              | Exon 10         | 5'- ACGGCTCTTCTGAGCTTTGG -3'   | 5'- CATGAGGCTGTGGGTGGA -3'     | 399              | 62                        | 2.5                          |
| 17              | Exon 11         | 5'- TCCGAGGTGCTCCCTGCT -3'     | 5'- GCCACATCCCGTGTAGCTCTT -3'  | 309              | 62                        | 0.5                          |
| 18              | Exon 12         | 5'- GGGTAAGAGCTACACGGGATG -3'  | 5'- CAGAGATTCAGGCGACAAGG -3'   | 371              | 61                        | 1                            |
| 19              | Exon 13         | 5'- CAGCCCACCCAGGAAAAA -3'     | 5'- GCCACTGTCTCCTCCCACA -3'    | 364              | 61                        | 1.5                          |
| 20              | Exon 14         | 5'- TGAGTTTCCTCTCCCCACCA -3'   | 5'- AGAGGGAGGGTCCCCTGAA -3'    | 336              | 65                        | 1.5                          |
| 21              | Exon 15         | 5'- CTGGCTCCCTTCTCAGCTC -3'    | 5'- AGTGCCAGTCAGACCAGTCC -3'   | 383              | 60                        | 2.5                          |
| 22              | Exon 16         | 5'- TCGAGCCAGGGAAGTGG -3'      | 5'- GGGAATGGAAAGCTGAATCC -3'   | 301              | 60                        | 1                            |
| 23              | Exon 17         | 5'- CATCCTGCCCTCCCAGA -3'      | 5'- GGGCTCTCCATCTCCACCAC -3'   | 323              | 64,5                      | 1                            |
| 24              | Exon 18a        | 5'- GGCTGGCACAGAGCTTCC -3'     | 5'- TCCCGTCTGACACACACA -3'     | 337              | 62                        | 1                            |
| 25              | Exon 19a        | 5'- CCAGCTTGAGACCCATCCC -3'    | 5'- GCGAAGGCACACAGCAGC -3'     | 417              | 67                        | 1.5                          |
| 26              | Exon 19a        | 5'- GGCAGTGCAAGAGACTCTG -3'    | 5'- GCTGAAGACAAAAACC -3'       | 478              | 60                        | 1.5                          |
| 27              | Exon 18c        | 5'- TCCTGTGCTACTTTGCCTTTT -3'  | 5'- GGACAGAGCTGGGAGGTG -3'     | 370              | 59                        | 1                            |
| 28              | Exon 19c        | 5'- GCACATGGTTGGGCTGTGT -3'    | 5'- GGCTTTAGTTGGGGAATGG -3'    | 367              | 63                        | 1                            |
